# Supplementary material for: Hepatocyte-Derived Igκ Exerts a Protective Effect against ConA-Induced Acute Liver Injury
Source: Int J Mol Sci. 2020 Dec 9;21(24):9379. doi: 10.3390/ijms21249379 (PMC7763521; doi:10.3390/ijms21249379)
Supplement: Supplementary file 1 [file ijms-21-09379-s001.pdf]

**Figure S1.** Immunofluorescence staining of CK18 and Igκ in primary hepatocytes.

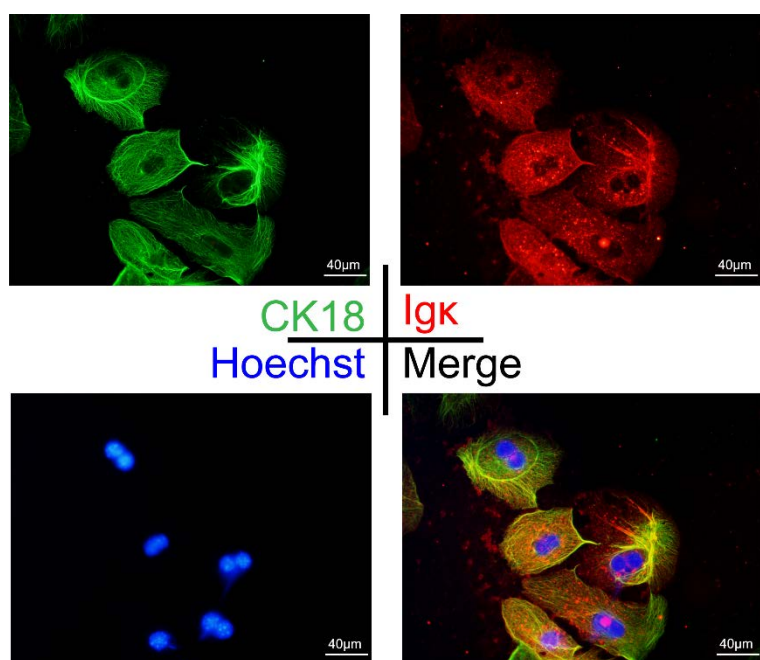

**Figure S1.** Immunofluorescence staining of CK18 and Igκ in primary hepatocytes.

**Figure S2.** Hepatocyte-derived Ig $\kappa$  inhibited ConA-induced liver injury *in vivo*.

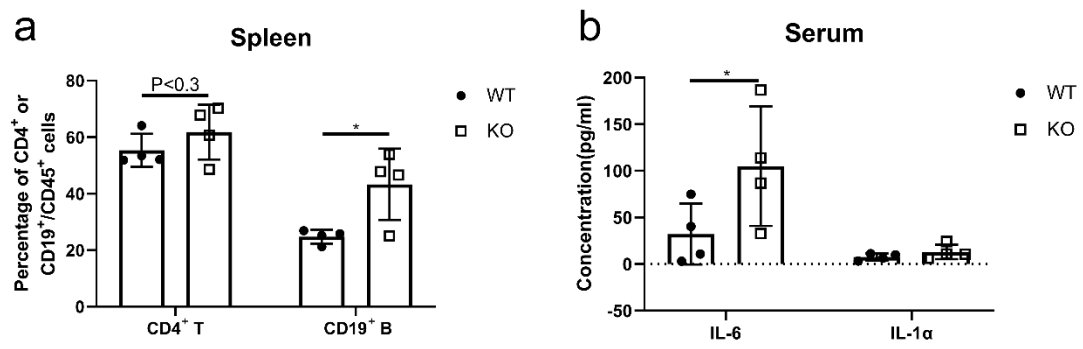

**Figure S2.** Hepatocyte-derived Ig $\kappa$  inhibited ConA-induced liver injury *in vivo*. WT and KO mice were stimulated by PBS or ConA for 24h and sacrificed 24 h later. **(a)** Percentage of spleen immune cell subsets was analyzed. **(b)** The concentrations of serum inflammatory factors in WT and KO mice were measured,  $p < 0.05$ .

**Figure S3.** Knockout of *Igκ* promoted hepatocytes apoptosis after ConA or LPS treatment *in vitro*.

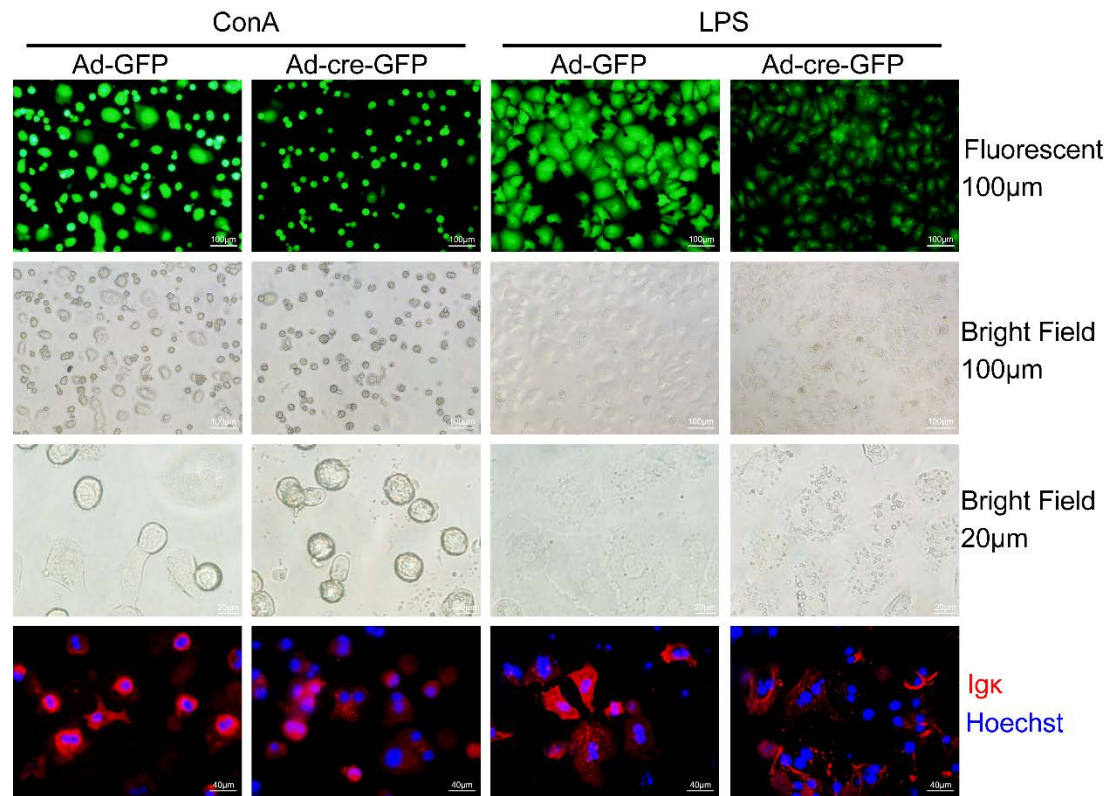

**Figure S3.** Knockout of *Igκ* promoted hepatocytes apoptosis after ConA or LPS treatment *in vitro*. Primary hepatocytes isolated from *Igκ<sup>fl/fl</sup>* mice were stimulated with concanavalin A and lipopolysaccharide after Ad-cre-GFP or Ad-GFP infection for 24 h. Fluorescent and bright-field images of primary hepatocytes were shown, and immunofluorescence staining of Igκ was detected.
